# Supplementary material for: The Involvement of Hypoxia in the Response of Neuroblastoma Cells to the Exposure of Atorvastatin
Source: MDPI journal article supplement (doi:10.3390/cimb45040218), 2023-04-11
Supplement: s1 [file s1]

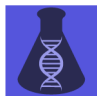

## Supplementary Materials

# Evidence of Increased Resistance in Neuroblastoma Cells after Administration of Drug Atorvastatin

Ana Salomé Correia <sup>1,2,3</sup>, Lara Marques <sup>1,3</sup> and Nuno Vale <sup>1,3,4,\*</sup>

<sup>1</sup>OncoPharma Research Group, Center for Health Technology and Services Research (CINTESIS), Rua Doutor Plácido da Costa, 4200-450 Porto, Portugal

<sup>2</sup>Institute of Biomedical Sciences Abel Salazar (ICBAS), University of Porto, Rua de Jorge Viterbo Ferreira, 228, 4050-313 Porto, Portugal

<sup>3</sup>CINTESIS@RISE, Faculty of Medicine, University of Porto, Alameda Professor Hernâni Monteiro, 4200-319 Porto, Portugal

<sup>4</sup>Department of Community Medicine, Information and Health Decision Sciences (MEDCIDS), Faculty of Medicine, University of Porto, Alameda Professor Hernâni Monteiro, 4200-319 Porto, Portugal

\*Correspondence: nunovale@med.up.pt; Tel.: +351-220-426-537

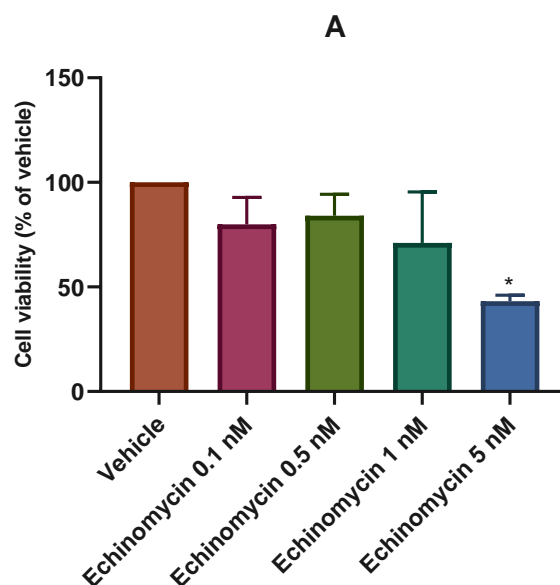

**Figure S1.** Effect of 48h-incubation of echinomycin 0.1 nM-5 nM, on the viability of SH-SY5Y cells, determined by MTT assay. The results represent the mean  $\pm$  SEM of three independent experiments, expressed as the percentage of the vehicle (100%). Statistically significant \*  $p < 0.05$  vs. vehicle.
